# Supplementary material
Source: publisher figshare collection journal article supplement (https://acs.figshare.com/ndownloader/files/4729630)
Supplement: Supplementary file 1 [file 4729630]

## Supporting Information

### Block Ionomer Networks from Poly(acrylic acid) and Poly(ethylene oxide): Sorption and Release of Cytochrome C

Kyung T. Oh<sup>1</sup>, Tatiana K. Bronich<sup>1</sup>, Victor A. Kabanov<sup>2</sup>, and Alexander V. Kabanov<sup>1</sup> \*

<sup>1</sup>College of Pharmacy, Department of Pharmaceutical Science and Center for Drug Delivery and Nanomedicine, 985830 University of Nebraska Medical Center, Omaha, Nebraska 68198-5830, USA

<sup>2</sup>Department of Polymer Sciences, Faculty of Chemistry, Moscow State University, Leninskie Gory, Moscow V-234, Russian Federation

**Figure S-1.** Effect of (a) NaCl (b) CaCl<sub>2</sub> and MgCl<sub>2</sub> (c) on the swelling of PN,  $Q$ , as a function of the concentration of added NaCl: (●) *c*/PAA, (■) PEO-*cl*-PAA(1:320), and (▲) PEO-*cl*-PAA(1:80). The data are mean  $\pm$  SEM, n = 3. The equilibrium swelling ratios for these hydrogels in distilled water,  $Q_0$  are presented in **Table 1** of the manuscript.

**Figure S-2.** Kinetics of sorption of cytochrome C in PN at  $z = 0.25$  and pH 9.5: (●) *c*/PAA, (■) PEO-*cl*-PAA(1:320), and (▲) PEO-*cl*-PAA(1:80). The insert present the data for a shorter time scale.

**Figure S-3.** Linearization of the data in Figure 4 of the main paper and Figure S-2 of the Supporting Information in the coordinates  $\ln[1 - F]$  vs  $t$ : (a)  $z = 0.25$ , pH 5.8; (b)  $z = 0.25$ , pH 9.5; and (c)  $z = 1$ , pH 5.8: (●) *c*/PAA, (■) PEO-*cl*-PAA(1:320), and (▲) PEO-*cl*-PAA(1:80). The insert present the data for a shorter time scales. The first rate kinetic constants for the sorption determined for the linear areas are presented in Table S-4 of the supplementary material.

**Figure S-5.** Linearization of the data in Figure 4 of the main paper and Figure S-2 of the Supporting Information in the coordinates of Fick law,  $F$  vs.  $t^{1/2}$ : (a)  $z = 0.25$ , pH 5.8; (b)  $z = 0.25$ , pH 9.5; and (c)  $z = 1$ , pH 5.8: (●) *c*/PAA, (■) PEO-*cl*-PAA(1:320), and (▲) PEO-*cl*-PAA(1:80). The insert present the data for a shorter time scales.

**Table S-4.** Rate constant values calculated from the kinetic data of inserts in Figure S-3

| System                   | z    | pH  | $K_s, s^{-1}$         |
|--------------------------|------|-----|-----------------------|
| <i>c</i> /PAA            |      |     | $2.31 \times 10^{-5}$ |
| PEO- <i>cl</i> -PAA(320) | 0.25 | 5.8 | $1.02 \times 10^{-5}$ |
| PEO- <i>cl</i> -PAA(80)  |      |     | $1.45 \times 10^{-5}$ |
| <i>c</i> /PAA            |      |     | $1.86 \times 10^{-5}$ |
| PEO- <i>cl</i> -PAA(320) | 0.25 | 9.5 | $1.62 \times 10^{-5}$ |
| PEO- <i>cl</i> -PAA(80)  |      |     | $1.21 \times 10^{-5}$ |
| <i>c</i> /PAA            |      |     | $4.66 \times 10^{-6}$ |
| PEO- <i>cl</i> -PAA(320) | 1    | 5.8 | $4.21 \times 10^{-6}$ |
| PEO- <i>cl</i> -PAA(80)  |      |     | $5.95 \times 10^{-6}$ |

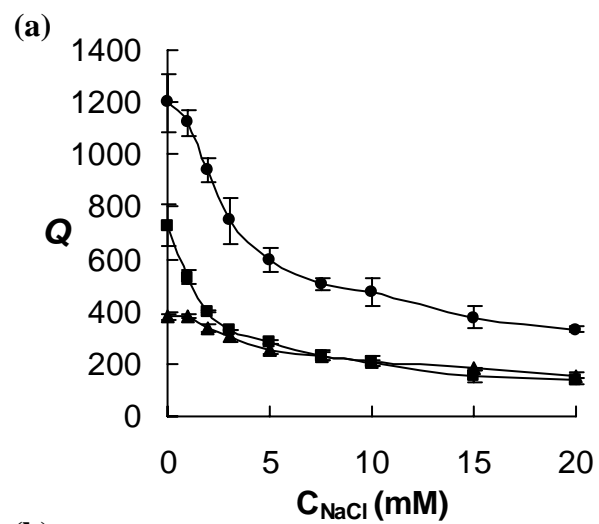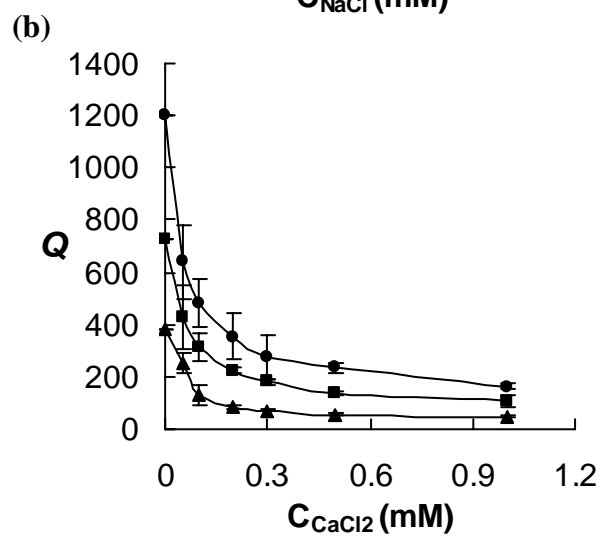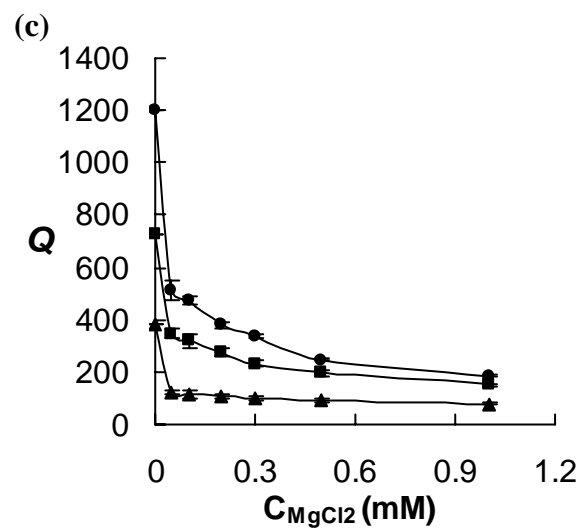

**Figure S-1.**

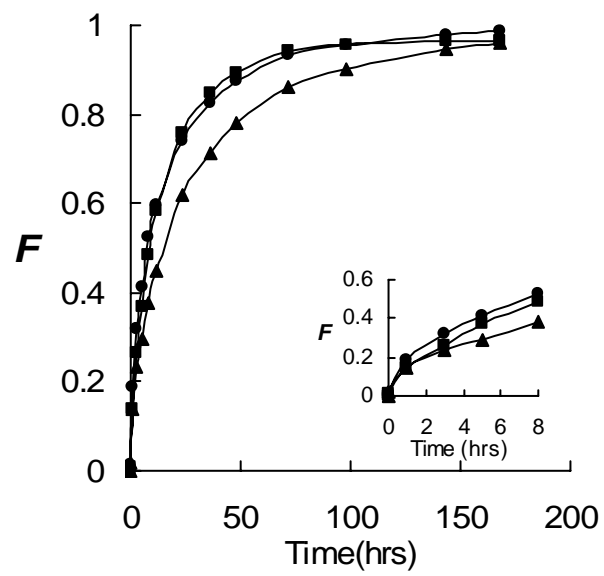

**Figure S-2.**

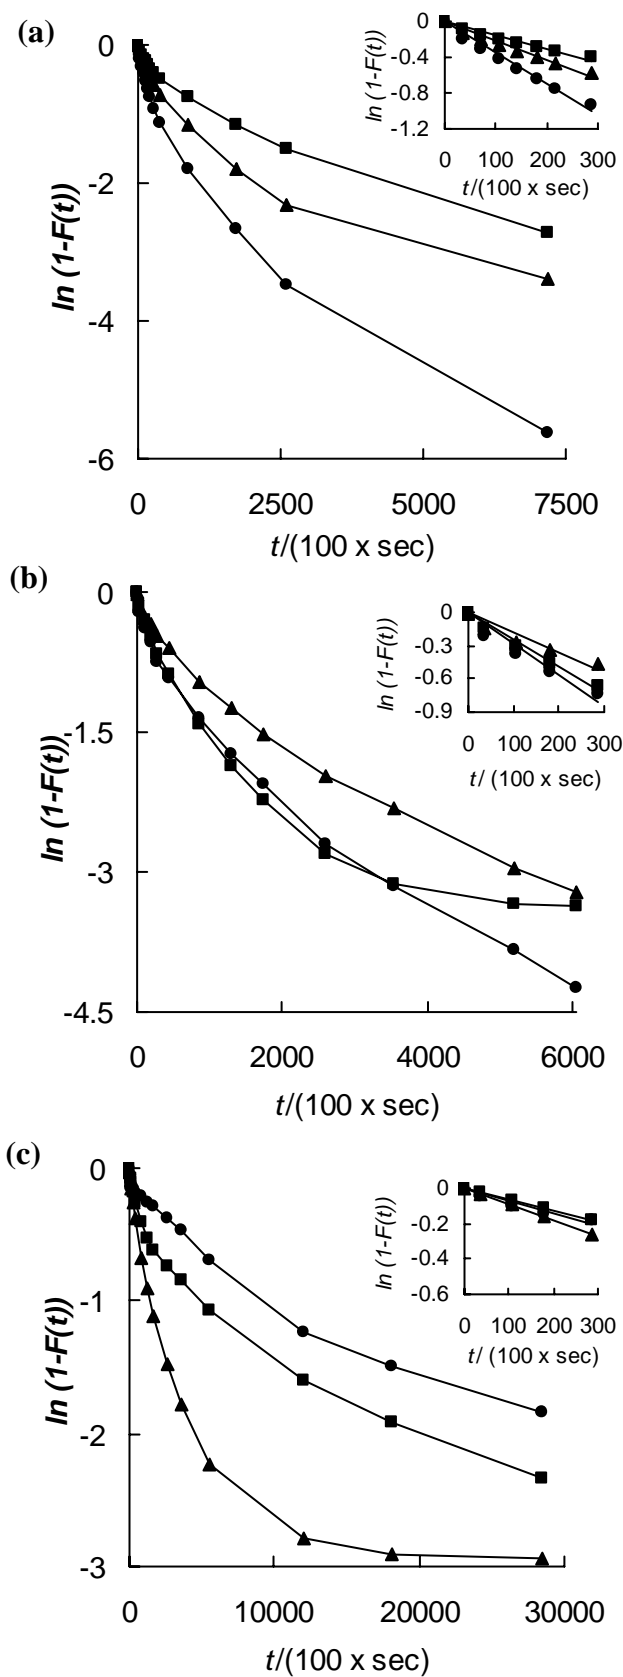

Figure S-3.

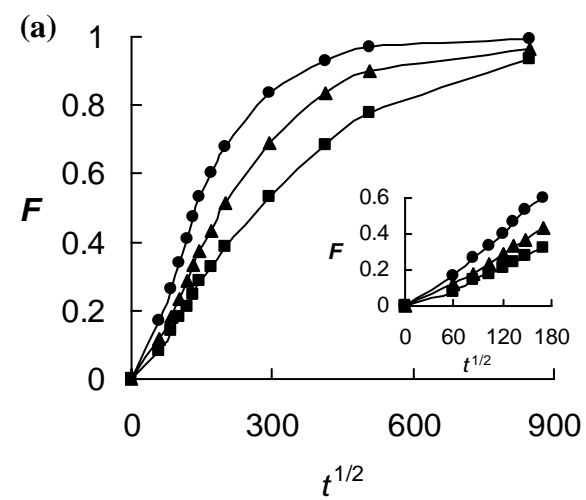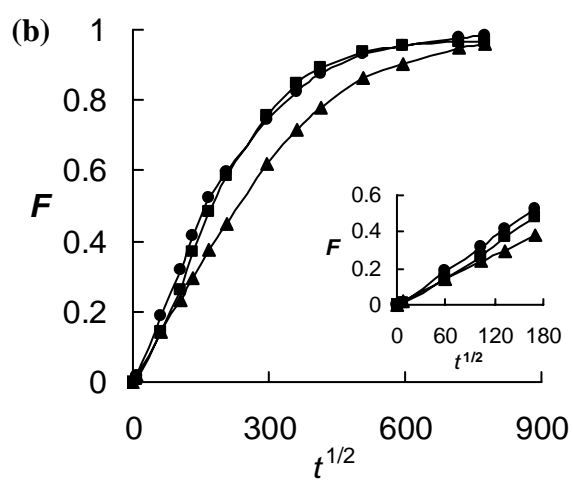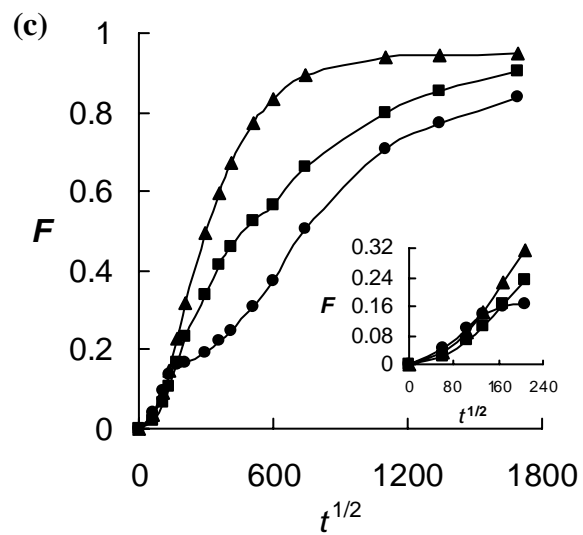

Figure S-5.
